# Supplementary material for: Peanut Sprout Extracts Attenuate Triglyceride Accumulation by Promoting Mitochondrial Fatty Acid Oxidation in Adipocytes
Source: PubMed Central journal article supplement (PMC6429123; doi:10.3390/ijms20051216), 2019-03-11
Supplement: ijms-20-01216-s001.pdf [file ijms-20-01216-s001.pdf]

**Table S 1.** Primer sequences for qPCR

| <b>Gene</b>     | <b>Forward/Reverse</b> | <b>Sequence (5'-3')</b>   |
|-----------------|------------------------|---------------------------|
| mPPAR $\gamma$  | Forward                | GGCGATCTTGACAGGAAAGAC     |
|                 | Reverse                | CCCTTGAAAAATTCGGATGG      |
| maP2            | Forward                | AGCATCATAACCCTAGATGGCG    |
|                 | Reverse                | CATAACACATTCCACCACCAGC    |
| mC/EBP $\alpha$ | Forward                | GGTTTTGCTCTGATTCTTGCC     |
|                 | Reverse                | CGAAAAAACCCAAACATCCC      |
| mFas            | Forward                | GGAGGTGGTGATAGCCGGTAT     |
|                 | Reverse                | TGGTAATCCATAGAGCCAG       |
| mPPAR $\alpha$  | Forward                | ACGATGCTGTCCCTTGATG       |
|                 | Reverse                | GTGTGATAAAGCCATTGCCGT     |
| mCPT1           | Forward                | CCAGGCTACAGTGGGACATT      |
|                 | Reverse                | AAGGAATGCAGGTCCACATC      |
| mPGC1 $\alpha$  | Forward                | CCCTGCCATTGTAAAGACC       |
|                 | Reverse                | TGCTGCTGTTCCCTGTTTTC      |
| mGAPDH          | Forward                | CATGGCCTCCGTGTTCCCTA      |
|                 | Reverse                | GCGGCACGTCAGATCCA         |
| mHPRT           | Forward                | TTGCTCGAGATGTCATGAAGGA    |
|                 | Reverse                | AGCAGGTCAGCAAAGAACTTATAGC |
